# Supplementary material
Source: PubMed Central journal article supplement (PMC4793460)
Supplement: muri011330.ww1_default.pdf [file muri011330.ww1_default.pdf]

**Supplementary Table 1.** Glycemic load (GL) and glycemic index (GI) of individual fruits.

| Items                                         | Serving size              | Carbohydrate<br>(g/serving) | Glycemic index<br>(Glucose=100) | Glycemic load<br>(/serving) |
|-----------------------------------------------|---------------------------|-----------------------------|---------------------------------|-----------------------------|
| High GL fruits (GL per serving = 8.1-19.2)    |                           |                             |                                 |                             |
| Prunes                                        | 1/2 cup                   | 32.5                        | 59                              | 19.2                        |
| Bananas                                       | 1                         | 26.9                        | 62                              | 16.7                        |
| Raisins or grapes                             | 1 oz or a bunch           |                             |                                 |                             |
| Raisins                                       |                           | 22.2                        | 64                              | 14.2                        |
| Grapes                                        |                           | 13.8                        | 59                              | 8.1                         |
| Fresh apples or pears                         | 1                         |                             |                                 |                             |
| Apples                                        |                           | 25.1                        | 39                              | 9.8                         |
| Pears                                         |                           | 27.6                        | 43                              | 11.9                        |
| Moderate GL fruits (GL per serving = 5.7-8.0) |                           |                             |                                 |                             |
| Cantaloupe                                    | 1/4                       | 11.3                        | 70                              | 7.9                         |
| Oranges                                       | 1                         | 15.5                        | 40                              | 6.2                         |
| Blueberries                                   | 1/2 cup                   | 10.7                        | 53                              | 5.7                         |
| Low GL fruits (GL per serving = 1.3-5.6)      |                           |                             |                                 |                             |
| Peaches, apricots, or plums                   | 1 fresh or 1/2 cup canned |                             |                                 |                             |
| Peaches                                       |                           | 14.3                        | 40                              | 5.7                         |
| Apricots                                      |                           | 3.9                         | 34                              | 1.3                         |
| Plums                                         |                           | 7.5                         | 39                              | 2.9                         |
| Grapefruit                                    | 1/2                       | 10.4                        | 47                              | 4.9                         |
| Strawberries                                  | 1/2 cup                   | 5.9                         | 40                              | 2.3                         |

**Supplementary Table 2.** Intake levels of individual fruits and Spearman correlation coefficients among individual fruits in the Nurses' Health Study (NHS), NHS II, and Health Professionals Follow-up Study (HPFS).

|                             | Intake level*<br>(servings/week) | Blueberries | Strawberries | Grapefruit | Oranges | Apples<br>and pears | Cantaloupe | Bananas | Prunes | Peaches, plums<br>and apricots |
|-----------------------------|----------------------------------|-------------|--------------|------------|---------|---------------------|------------|---------|--------|--------------------------------|
| Grapes and raisins          |                                  |             |              |            |         |                     |            |         |        |                                |
| NHS                         | 0.5 [0, 0.5]                     | 0.21        | 0.21         | 0.21       | 0.22    | 0.28                | 0.20       | 0.26    | 0.27   | 0.26                           |
| NHS II                      | 0.5 [0, 0.5]                     | 0.19        | 0.20         | 0.17       | 0.21    | 0.27                | 0.19       | 0.27    | 0.22   | 0.23                           |
| HPFS                        | 0.5 [0, 1.0]                     | 0.21        | 0.22         | 0.19       | 0.23    | 0.27                | 0.20       | 0.27    | 0.28   | 0.25                           |
| Peaches, plums and apricots |                                  |             |              |            |         |                     |            |         |        |                                |
| NHS                         | 0.5 [0, 1.0]                     | 0.29        | 0.44         | 0.24       | 0.30    | 0.30                | 0.33       | 0.24    | 0.17   | -                              |
| NHS II                      | 0.5 [0, 1.0]                     | 0.34        | 0.47         | 0.24       | 0.34    | 0.32                | 0.32       | 0.23    | 0.14   | -                              |
| HPFS                        | 0.5 [0, 1.0]                     | 0.35        | 0.44         | 0.23       | 0.29    | 0.31                | 0.32       | 0.23    | 0.21   | -                              |
| Prunes                      |                                  |             |              |            |         |                     |            |         |        |                                |
| NHS                         | 0 [0, 0]                         | 0.13        | 0.11         | 0.16       | 0.15    | 0.15                | 0.13       | 0.16    | -      | -                              |
| NHS II                      | 0 [0, 0]                         | 0.12        | 0.09         | 0.15       | 0.14    | 0.14                | 0.10       | 0.13    | -      | -                              |
| HPFS                        | 0 [0, 0]                         | 0.16        | 0.13         | 0.17       | 0.18    | 0.16                | 0.13       | 0.17    | -      | -                              |
| Bananas                     |                                  |             |              |            |         |                     |            |         |        |                                |
| NHS                         | 1.0 [0.5, 3.0]                   | 0.12        | 0.19         | 0.16       | 0.23    | 0.28                | 0.25       | -       | -      | -                              |
| NHS II                      | 1.0 [0.5, 3.0]                   | 0.13        | 0.21         | 0.14       | 0.23    | 0.32                | 0.25       | -       | -      | -                              |
| HPFS                        | 1.0 [0.5, 3.0]                   | 0.15        | 0.20         | 0.18       | 0.28    | 0.33                | 0.24       | -       | -      | -                              |
| Cantaloupe                  |                                  |             |              |            |         |                     |            |         |        |                                |
| NHS                         | 0.5 [0, 1.0]                     | 0.25        | 0.41         | 0.31       | 0.27    | 0.27                | -          | -       | -      | -                              |
| NHS II                      | 0.5 [0, 1.0]                     | 0.25        | 0.38         | 0.26       | 0.29    | 0.27                | -          | -       | -      | -                              |
| HPFS                        | 0.5 [0, 0.5]                     | 0.28        | 0.38         | 0.34       | 0.27    | 0.27                | -          | -       | -      | -                              |
| Apples and pears            |                                  |             |              |            |         |                     |            |         |        |                                |
| NHS                         | 1.0 [0.5, 3.0]                   | 0.20        | 0.24         | 0.29       | 0.44    | -                   | -          | -       | -      | -                              |
| NHS II                      | 1.0 [0.5, 3.0]                   | 0.20        | 0.26         | 0.25       | 0.42    | -                   | -          | -       | -      | -                              |
| HPFS                        | 1.0 [0.5, 3.0]                   | 0.21        | 0.23         | 0.23       | 0.41    | -                   | -          | -       | -      | -                              |
| Oranges                     |                                  |             |              |            |         |                     |            |         |        |                                |
| NHS                         | 0.5 [0.5, 3.0]                   | 0.19        | 0.26         | 0.37       | -       | -                   | -          | -       | -      | -                              |
| NHS II                      | 0.5 [0, 1.0]                     | 0.23        | 0.31         | 0.38       | -       | -                   | -          | -       | -      | -                              |
| HPFS                        | 1.0 [0.5, 3.0]                   | 0.22        | 0.28         | 0.36       | -       | -                   | -          | -       | -      | -                              |

|              |                |      |      |   |
|--------------|----------------|------|------|---|
| Grapefruit   |                |      |      |   |
| NHS          | 0.5 [0, 1.0]   | 0.24 | 0.27 | - |
| NHS II       | 0 [0, 0.5]     | 0.23 | 0.25 | - |
| HPFS         | 0.5 [0, 1.0]   | 0.25 | 0.29 | - |
| Strawberries |                |      |      |   |
| NHS          | 0.5 [0, 1.0]   | 0.42 | -    |   |
| NHS II       | 0.5 [0.5, 1.0] | 0.40 | -    |   |
| HPFS         | 0.5 [0, 0.5]   | 0.48 | -    |   |
| Blueberries  |                |      |      |   |
| NHS          | 0 [0, 0.5]     | -    |      |   |
| NHS II       | 0 [0, 0.5]     | -    |      |   |
| HPFS         | 0 [0, 0.5]     | -    |      |   |

---

HPFS=Health Professionals Follow-up Study; NHS=Nurses' Health Study.

\* Median [interquartile range]

**Supplementary Table 3.** Hazard ratios (95% confidence intervals) of type 2 diabetes for individual fruit consumption in the Nurses' Health Study (NHS), NHS II, and Health Professionals Follow-up Study (HPFS).

|                                    | Consumption levels |                     |                     |                     |                     | Linear trend*       |
|------------------------------------|--------------------|---------------------|---------------------|---------------------|---------------------|---------------------|
|                                    | <1 serving/month   | 1-3 servings/month  | 1 serving/week      | 2-4 servings/week   | ≥5 servings/week    |                     |
| <b>Raisins and grapes</b>          |                    |                     |                     |                     |                     |                     |
| <b>NHS</b>                         |                    |                     |                     |                     |                     |                     |
| Age-adjusted HR                    | 1.00               | 0.75 (0.71 to 0.79) | 0.63 (0.58 to 0.68) | 0.49 (0.44 to 0.53) | 0.44 (0.37 to 0.53) | 0.56 (0.52 to 0.60) |
| Multivariable-adjusted HR†         | 1.00               | 0.86 (0.81 to 0.91) | 0.80 (0.74 to 0.87) | 0.71 (0.64 to 0.79) | 0.69 (0.58 to 0.82) | 0.78 (0.72 to 0.84) |
| <b>NHS II</b>                      |                    |                     |                     |                     |                     |                     |
| Age-adjusted HR                    | 1.00               | 0.59 (0.54 to 0.63) | 0.52 (0.46 to 0.58) | 0.40 (0.34 to 0.45) | 0.40 (0.30 to 0.52) | 0.48 (0.42 to 0.54) |
| Multivariable-adjusted HR†         | 1.00               | 0.75 (0.69 to 0.82) | 0.76 (0.68 to 0.86) | 0.73 (0.63 to 0.84) | 0.80 (0.60 to 1.06) | 0.82 (0.73 to 0.92) |
| <b>HPFS</b>                        |                    |                     |                     |                     |                     |                     |
| Age-adjusted HR                    | 1.00               | 0.84 (0.77 to 0.92) | 0.77 (0.68 to 0.87) | 0.61 (0.54 to 0.70) | 0.54 (0.45 to 0.66) | 0.69 (0.63 to 0.75) |
| Multivariable-adjusted HR†         | 1.00               | 0.92 (0.84 to 1.01) | 0.92 (0.81 to 1.03) | 0.81 (0.71 to 0.93) | 0.79 (0.65 to 0.97) | 0.86 (0.79 to 0.95) |
| <b>Peaches, plums and apricots</b> |                    |                     |                     |                     |                     |                     |
| <b>NHS</b>                         |                    |                     |                     |                     |                     |                     |
| Age-adjusted HR                    | 1.00               | 0.84 (0.79 to 0.90) | 0.79 (0.74 to 0.85) | 0.73 (0.67 to 0.80) | 0.71 (0.61 to 0.84) | 0.81 (0.76 to 0.87) |
| Multivariable-adjusted HR†         | 1.00               | 0.91 (0.85 to 0.97) | 0.90 (0.84 to 0.96) | 0.87 (0.80 to 0.95) | 0.79 (0.67 to 0.93) | 0.90 (0.84 to 0.96) |
| <b>NHS II</b>                      |                    |                     |                     |                     |                     |                     |
| Age-adjusted HR                    | 1.00               | 0.79 (0.72 to 0.86) | 0.72 (0.65 to 0.79) | 0.61 (0.54 to 0.69) | 0.70 (0.55 to 0.89) | 0.73 (0.66 to 0.80) |
| Multivariable-adjusted HR†         | 1.00               | 0.93 (0.85 to 1.02) | 0.89 (0.80 to 0.99) | 0.83 (0.73 to 0.94) | 0.86 (0.68 to 1.10) | 0.88 (0.80 to 0.97) |
| <b>HPFS</b>                        |                    |                     |                     |                     |                     |                     |
| Age-adjusted HR                    | 1.00               | 0.85 (0.78 to 0.93) | 0.83 (0.74 to 0.93) | 0.70 (0.61 to 0.81) | 0.59 (0.44 to 0.80) | 0.74 (0.66 to 0.83) |
| Multivariable-adjusted HR†         | 1.00               | 0.93 (0.84 to 1.02) | 0.98 (0.87 to 1.10) | 0.82 (0.71 to 0.94) | 0.73 (0.54 to 0.99) | 0.84 (0.75 to 0.94) |
| <b>Prunes</b>                      |                    |                     |                     |                     |                     |                     |
| <b>NHS</b>                         |                    |                     |                     |                     |                     |                     |
| Age-adjusted HR                    | 1.00               | 0.75 (0.70 to 0.80) | 0.59 (0.50 to 0.69) | 0.54 (0.46 to 0.64) |                     | 0.43 (0.36 to 0.50) |
| Multivariable-adjusted HR†         | 1.00               | 0.91 (0.85 to 0.97) | 0.78 (0.66 to 0.92) | 0.80 (0.68 to 0.95) |                     | 0.74 (0.63 to 0.86) |
| <b>NHS II</b>                      |                    |                     |                     |                     |                     |                     |
| Age-adjusted HR                    | 1.00               | 0.60 (0.53 to 0.67) | 0.66 (0.51 to 0.86) | 0.63 (0.48 to 0.82) |                     | 0.41 (0.30 to 0.54) |
| Multivariable-adjusted HR†         | 1.00               | 0.77 (0.68 to 0.87) | 0.93 (0.72 to 1.22) | 1.07 (0.82 to 1.41) |                     | 0.88 (0.67 to 1.15) |
| <b>HPFS</b>                        |                    |                     |                     |                     |                     |                     |
| Age-adjusted HR                    | 1.00               | 0.80 (0.70 to 0.91) | 0.74 (0.56 to 0.97) | 0.65 (0.50 to 0.84) |                     | 0.59 (0.45 to 0.76) |

|                            |      |                     |                     |                     |                     |                     |
|----------------------------|------|---------------------|---------------------|---------------------|---------------------|---------------------|
| Multivariable-adjusted HR† | 1.00 | 0.89 (0.78 to 1.02) | 0.81 (0.61 to 1.06) | 0.83 (0.64 to 1.08) | 0.78 (0.60 to 1.01) |                     |
| Bananas                    |      |                     |                     |                     |                     |                     |
| NHS                        |      |                     |                     |                     |                     |                     |
| Age-adjusted HR            | 1.00 | 1.10 (1.00 to 1.22) | 1.05 (0.95 to 1.15) | 0.88 (0.80 to 0.97) | 0.83 (0.74 to 0.93) | 0.84 (0.81 to 0.88) |
| Multivariable-adjusted HR† | 1.00 | 1.04 (0.94 to 1.14) | 0.98 (0.89 to 1.09) | 0.93 (0.84 to 1.02) | 0.95 (0.85 to 1.06) | 0.95 (0.90 to 0.99) |
| NHS II                     |      |                     |                     |                     |                     |                     |
| Age-adjusted HR            | 1.00 | 0.95 (0.84 to 1.07) | 0.81 (0.72 to 0.92) | 0.61 (0.54 to 0.69) | 0.53 (0.46 to 0.62) | 0.68 (0.63 to 0.72) |
| Multivariable-adjusted HR† | 1.00 | 0.90 (0.79 to 1.01) | 0.86 (0.76 to 0.98) | 0.73 (0.64 to 0.83) | 0.72 (0.61 to 0.84) | 0.83 (0.77 to 0.89) |
| HPFS                       |      |                     |                     |                     |                     |                     |
| Age-adjusted HR            | 1.00 | 1.10 (0.96 to 1.25) | 0.97 (0.84 to 1.11) | 0.80 (0.70 to 0.91) | 0.61 (0.53 to 0.71) | 0.73 (0.69 to 0.78) |
| Multivariable-adjusted HR† | 1.00 | 1.07 (0.94 to 1.22) | 1.00 (0.87 to 1.15) | 0.89 (0.78 to 1.01) | 0.82 (0.70 to 0.96) | 0.86 (0.81 to 0.92) |
| Cantaloupe                 |      |                     |                     |                     |                     |                     |
| NHS                        |      |                     |                     |                     |                     |                     |
| Age-adjusted HR            | 1.00 | 0.85 (0.79 to 0.91) | 0.85 (0.79 to 0.91) | 0.77 (0.71 to 0.85) | 0.82 (0.75 to 0.89) |                     |
| Multivariable-adjusted HR† | 1.00 | 0.93 (0.86 to 0.99) | 0.94 (0.87 to 1.01) | 0.89 (0.81 to 0.97) | 0.91 (0.83 to 1.00) |                     |
| NHS II                     |      |                     |                     |                     |                     |                     |
| Age-adjusted HR            | 1.00 | 0.73 (0.67 to 0.80) | 0.71 (0.64 to 0.78) | 0.65 (0.56 to 0.75) | 0.65 (0.56 to 0.75) |                     |
| Multivariable-adjusted HR† | 1.00 | 0.90 (0.83 to 0.99) | 0.92 (0.83 to 1.01) | 0.92 (0.79 to 1.06) | 0.93 (0.80 to 1.07) |                     |
| HPFS                       |      |                     |                     |                     |                     |                     |
| Age-adjusted HR            | 1.00 | 1.00 (0.91 to 1.10) | 0.94 (0.84 to 1.05) | 0.88 (0.76 to 1.02) | 0.87 (0.75 to 1.00) |                     |
| Multivariable-adjusted HR† | 1.00 | 1.08 (0.98 to 1.19) | 1.07 (0.96 to 1.21) | 1.04 (0.89 to 1.21) | 1.02 (0.88 to 1.18) |                     |
| Apples and pears           |      |                     |                     |                     |                     |                     |
| NHS                        |      |                     |                     |                     |                     |                     |
| Age-adjusted HR            | 1.00 | 0.85 (0.77 to 0.93) | 0.82 (0.74 to 0.90) | 0.68 (0.62 to 0.74) | 0.61 (0.55 to 0.67) | 0.79 (0.76 to 0.82) |
| Multivariable-adjusted HR† | 1.00 | 0.88 (0.80 to 0.97) | 0.87 (0.79 to 0.96) | 0.76 (0.69 to 0.84) | 0.72 (0.64 to 0.80) | 0.86 (0.83 to 0.90) |
| NHS II                     |      |                     |                     |                     |                     |                     |
| Age-adjusted HR            | 1.00 | 0.72 (0.63 to 0.81) | 0.63 (0.55 to 0.72) | 0.49 (0.43 to 0.56) | 0.47 (0.40 to 0.54) | 0.71 (0.67 to 0.76) |
| Multivariable-adjusted HR† | 1.00 | 0.76 (0.67 to 0.87) | 0.75 (0.65 to 0.85) | 0.67 (0.59 to 0.77) | 0.65 (0.56 to 0.76) | 0.86 (0.81 to 0.92) |
| HPFS                       |      |                     |                     |                     |                     |                     |
| Age-adjusted HR            | 1.00 | 0.87 (0.76 to 1.01) | 0.85 (0.73 to 0.98) | 0.73 (0.63 to 0.84) | 0.69 (0.59 to 0.80) | 0.84 (0.79 to 0.89) |
| Multivariable-adjusted HR† | 1.00 | 0.88 (0.76 to 1.02) | 0.94 (0.80 to 1.09) | 0.83 (0.72 to 0.97) | 0.83 (0.71 to 0.97) | 0.93 (0.87 to 0.99) |
| Oranges                    |      |                     |                     |                     |                     |                     |
| NHS                        |      |                     |                     |                     |                     |                     |

|                            |      |                     |                     |                     |                     |                     |
|----------------------------|------|---------------------|---------------------|---------------------|---------------------|---------------------|
| Age-adjusted HR            | 1.00 | 0.88 (0.81 to 0.94) | 0.88 (0.81 to 0.95) | 0.75 (0.69 to 0.81) | 0.79 (0.72 to 0.88) | 0.87 (0.83 to 0.91) |
| Multivariable-adjusted HR† | 1.00 | 0.89 (0.82 to 0.96) | 0.93 (0.85 to 1.01) | 0.81 (0.75 to 0.88) | 0.85 (0.77 to 0.95) | 0.92 (0.87 to 0.96) |
| NHS II                     |      |                     |                     |                     |                     |                     |
| Age-adjusted HR            | 1.00 | 0.78 (0.71 to 0.85) | 0.73 (0.65 to 0.81) | 0.63 (0.56 to 0.71) | 0.71 (0.58 to 0.86) | 0.78 (0.72 to 0.85) |
| Multivariable-adjusted HR† | 1.00 | 0.85 (0.78 to 0.94) | 0.82 (0.74 to 0.92) | 0.78 (0.69 to 0.88) | 0.80 (0.65 to 0.98) | 0.88 (0.80 to 0.96) |
| HPFS                       |      |                     |                     |                     |                     |                     |
| Age-adjusted HR            | 1.00 | 0.86 (0.77 to 0.97) | 0.83 (0.73 to 0.94) | 0.74 (0.65 to 0.83) | 0.72 (0.62 to 0.83) | 0.85 (0.79 to 0.91) |
| Multivariable-adjusted HR† | 1.00 | 0.88 (0.78 to 0.99) | 0.90 (0.79 to 1.02) | 0.84 (0.74 to 0.95) | 0.83 (0.72 to 0.97) | 0.93 (0.86 to 0.99) |
| Grapefruit                 |      |                     |                     |                     |                     |                     |
| NHS                        |      |                     |                     |                     |                     |                     |
| Age-adjusted HR            | 1.00 | 0.76 (0.72 to 0.81) | 0.75 (0.70 to 0.81) | 0.64 (0.59 to 0.69) | 0.62 (0.55 to 0.71) | 0.75 (0.70 to 0.79) |
| Multivariable-adjusted HR† | 1.00 | 0.85 (0.80 to 0.91) | 0.89 (0.83 to 0.96) | 0.79 (0.72 to 0.86) | 0.79 (0.69 to 0.89) | 0.87 (0.82 to 0.92) |
| NHS II                     |      |                     |                     |                     |                     |                     |
| Age-adjusted HR            | 1.00 | 0.73 (0.68 to 0.80) | 0.78 (0.69 to 0.87) | 0.65 (0.56 to 0.75) | 0.73 (0.55 to 0.96) | 0.72 (0.64 to 0.80) |
| Multivariable-adjusted HR† | 1.00 | 0.91 (0.83 to 0.99) | 0.97 (0.86 to 1.09) | 0.87 (0.75 to 1.01) | 0.85 (0.65 to 1.13) | 0.90 (0.80 to 1.01) |
| HPFS                       |      |                     |                     |                     |                     |                     |
| Age-adjusted HR            | 1.00 | 0.89 (0.81 to 0.98) | 0.89 (0.79 to 1.00) | 0.76 (0.67 to 0.86) | 0.82 (0.69 to 0.97) | 0.86 (0.80 to 0.93) |
| Multivariable-adjusted HR† | 1.00 | 1.00 (0.90 to 1.10) | 1.06 (0.94 to 1.20) | 0.88 (0.78 to 1.00) | 1.05 (0.88 to 1.25) | 0.97 (0.89 to 1.05) |
| Strawberries               |      |                     |                     |                     |                     |                     |
| NHS                        |      |                     |                     |                     |                     |                     |
| Age-adjusted HR            | 1.00 | 0.76 (0.71 to 0.81) | 0.75 (0.69 to 0.80) | 0.60 (0.55 to 0.67) | 0.67 (0.54 to 0.83) | 0.72 (0.67 to 0.78) |
| Multivariable-adjusted HR† | 1.00 | 0.86 (0.81 to 0.93) | 0.88 (0.81 to 0.94) | 0.73 (0.66 to 0.81) | 0.83 (0.66 to 1.03) | 0.83 (0.76 to 0.90) |
| NHS II                     |      |                     |                     |                     |                     |                     |
| Age-adjusted HR            | 1.00 | 0.73 (0.66 to 0.80) | 0.66 (0.59 to 0.73) | 0.63 (0.55 to 0.72) | 0.67 (0.52 to 0.86) | 0.78 (0.70 to 0.86) |
| Multivariable-adjusted HR† | 1.00 | 0.86 (0.78 to 0.95) | 0.87 (0.78 to 0.97) | 0.85 (0.74 to 0.97) | 0.83 (0.64 to 1.08) | 0.93 (0.84 to 1.03) |
| HPFS                       |      |                     |                     |                     |                     |                     |
| Age-adjusted HR            | 1.00 | 0.81 (0.74 to 0.88) | 0.78 (0.69 to 0.88) | 0.79 (0.67 to 0.94) | 1.06 (0.72 to 1.57) | 0.86 (0.74 to 0.99) |
| Multivariable-adjusted HR† | 1.00 | 0.91 (0.83 to 0.99) | 0.94 (0.83 to 1.06) | 0.97 (0.82 to 1.16) | 1.22 (0.82 to 1.81) | 1.03 (0.89 to 1.19) |
| Blueberries                |      |                     |                     |                     |                     |                     |
| NHS                        |      |                     |                     |                     |                     |                     |
| Age-adjusted HR            | 1.00 | 0.72 (0.68 to 0.77) | 0.71 (0.66 to 0.77) | 0.55 (0.47 to 0.65) |                     | 0.44 (0.37 to 0.50) |
| Multivariable-adjusted HR† | 1.00 | 0.84 (0.80 to 0.89) | 0.85 (0.78 to 0.92) | 0.71 (0.60 to 0.83) |                     | 0.65 (0.56 to 0.75) |
| NHS II                     |      |                     |                     |                     |                     |                     |

|                            |      |                     |                     |                     |                     |
|----------------------------|------|---------------------|---------------------|---------------------|---------------------|
| Age-adjusted HR            | 1.00 | 0.59 (0.54 to 0.64) | 0.63 (0.56 to 0.72) | 0.48 (0.39 to 0.59) | 0.33 (0.27 to 0.41) |
| Multivariable-adjusted HR† | 1.00 | 0.79 (0.72 to 0.86) | 0.87 (0.77 to 0.99) | 0.67 (0.55 to 0.83) | 0.63 (0.52 to 0.77) |
| HPFS                       |      |                     |                     |                     |                     |
| Age-adjusted HR            | 1.00 | 0.81 (0.74 to 0.88) | 0.78 (0.67 to 0.92) | 0.63 (0.48 to 0.82) | 0.53 (0.41 to 0.67) |
| Multivariable-adjusted HR† | 1.00 | 0.91 (0.83 to 0.99) | 0.97 (0.83 to 1.15) | 0.77 (0.58 to 1.00) | 0.76 (0.60 to 0.96) |

HPFS=Health Professionals Follow-up Study; HR=hazard ratio; NHS=Nurses' Health Study.

\* Linear trend was modeled based on every three servings/week increment.

† Multivariable model was adjusted for age (years), ethnicity (Caucasian, African American, Hispanic, or Asian), body mass index (<23.0, 23.0-24.9, 25.0-26.9, 27.0-28.9, 29.0-30.9, 31.0-32.9, 33.0-34.9, 35.0-36.9, 37.0-38.9, 39.0-40.9, 41.0-42.9, 43.0-44.9, ≥45.0 kg/m<sup>2</sup>, or missing), smoking status [never, past, current smoker (1-14, 15-24, or ≥25 cigarettes/day), or missing], multivitamin use (yes or no), physical activity (<3.0, 3.0-8.9, 9.0-17.9, 18.0-26.9, ≥27.0 Mets-hour/week, or missing), a family history of diabetes (yes or no), menopausal status and post-menopausal hormone use [pre-menopause, post-menopause (never, past, or current hormone use), or missing, for women], oral contraceptive use (yes, no, or missing for NHS II) total energy intake (kcal/day), fruit juice consumption (<1, 1, 2-4, or 5-6 servings/week, or ≥1 serving/day) and the modified alternate healthy eating index score (fifths).

**Supplementary Table 4.** Pooled hazard ratios (95% confidence intervals) of type 2 diabetes\* for consumption of individual fruits, Nurses' Health Study, Nurses' Health Study II, and Health Professionals Follow-up Study.

|                             | Full model <sup>†</sup> | Full model<br>+ anthocyanins | Full model<br>+ flavonoid subtypes <sup>‡</sup> |
|-----------------------------|-------------------------|------------------------------|-------------------------------------------------|
| Grapes and raisins          | 0.88 (0.83 to 0.93)     | 0.88 (0.83 to 0.93)          | 0.88 (0.83 to 0.93)                             |
| Peaches, plums and apricots | 0.97 (0.92 to 1.02)     | 0.97 (0.92 to 1.02)          | 0.97 (0.92 to 1.02)                             |
| Prunes                      | 0.89 (0.79 to 1.01)     | 0.90 (0.79 to 1.01)          | 0.90 (0.80 to 1.02)                             |
| Bananas                     | 0.95 (0.91 to 0.98)     | 0.95 (0.92 to 0.98)          | 0.95 (0.92 to 0.98)                             |
| Cantaloupe                  | 1.10 (1.02 to 1.18)     | 1.10 (1.02 to 1.18)          | 1.10 (1.02 to 1.18)                             |
| Apples and pears            | 0.93 (0.90 to 0.96)     | 0.93 (0.90 to 0.96)          | 0.94 (0.91 to 0.98)                             |
| Oranges                     | 0.99 (0.95 to 1.03)     | 0.99 (0.95 to 1.03)          | 0.98 (0.94 to 1.03)                             |
| Grapefruits                 | 0.95 (0.91 to 0.99)     | 0.95 (0.91 to 0.99)          | 0.94 (0.90 to 0.99)                             |
| Strawberries                | 1.03 (0.96 to 1.10)     | 0.99 (0.92 to 1.07)          | 0.99 (0.92 to 1.07)                             |
| Blueberries                 | 0.74 (0.66 to 0.83)     | 0.70 (0.61 to 0.81)          | 0.70 (0.61 to 0.81)                             |

\* Linear trend was estimated based on every three servings/week increment. Study estimates from three cohorts were pooled using a fixed-effects model.

<sup>†</sup> Adjusted for age (years), ethnicity (Caucasian, African American, Hispanic, or Asian), body mass index (<23, 23.0-24.9, 25.0-26.9, 27.0-28.9, 29.0-30.9, 31.0-32.9, 33.0-34.9, 35.0-36.9, 37.0-38.9, 39.0-40.9, 41.0-42.9, 43.0-44.9,  $\geq 45.0$  kg/m<sup>2</sup>, or missing), smoking status [never, past, current (1-14, 15-24, or  $\geq 25$  cigarettes/day), or missing], multivitamin use (yes or no), physical activity (<3, 3.0-8.9, 9.0-17.9, 18.0-26.9,  $\geq 27.0$  MET-hours/week, or missing), a family history of diabetes (yes or no), menopausal status and post-menopausal hormone use [pre-menopause, post-menopause (never, past, or current hormone use), or missing, for women], oral contraceptive use (yes, no, or missing, for Nurses' Health Study II) total energy intake (kcal/day), fruit juice consumption (<1, 1, 2-4, or 5-6 servings/week, or  $\geq 1$  serving/day) and the modified alternate healthy eating index score (fifths). Individual fruit consumption was mutually adjusted.

<sup>‡</sup> Intake levels of flavonols, flavones, flavanones, flavan-3-ols, and anthocyanins were adjusted.



**Supplementary Table 5.** Pooled hazard ratios (95% confidence intervals) of type 2 diabetes\* for three servings/week of individual fruit consumption, results from sensitivity analyses.

|                             | Sensitivity analysis 1 <sup>†</sup> | Sensitivity analysis 2 <sup>‡</sup> | Sensitivity analysis 3 <sup>§</sup> | Sensitivity analysis 4 <sup>¶</sup> |
|-----------------------------|-------------------------------------|-------------------------------------|-------------------------------------|-------------------------------------|
| Grapes and raisins          | 0.90 (0.85 to 0.95)                 | 0.86 (0.81 to 0.90)                 | 0.92 (0.87 to 0.98)                 | 0.91 (0.87 to 0.95)                 |
| Peaches, plums and apricots | 0.95 (0.90 to 1.00)                 | 0.96 (0.91 to 1.01)                 | 0.95 (0.89 to 1.00)                 | 0.99 (0.94 to 1.04)                 |
| Prunes                      | 0.91 (0.80 to 1.03)                 | 0.86 (0.77 to 0.98)                 | 0.91 (0.79 to 1.05)                 | 0.98 (0.89 to 1.08)                 |
| Bananas                     | 0.97 (0.94 to 1.00)                 | 0.95 (0.91 to 0.98)                 | 1.04 (1.00 to 1.07)                 | 1.01 (0.97 to 1.04)                 |
| Cantaloupe                  | 1.08 (1.01 to 1.17)                 | 1.11 (1.03 to 1.20)                 | 1.17 (1.08 to 1.27)                 | 1.17 (1.10 to 1.24)                 |
| Apples and pears            | 0.94 (0.91 to 0.97)                 | 0.94 (0.91 to 0.98)                 | 0.96 (0.92 to 0.99)                 | 0.93 (0.89 to 0.96)                 |
| Oranges                     | 0.99 (0.95 to 1.03)                 | 1.00 (0.96 to 1.04)                 | 1.02 (0.98 to 1.06)                 | 1.03 (0.99 to 1.07)                 |
| Grapefruit                  | 0.94 (0.90 to 0.99)                 | 0.96 (0.92 to 1.01)                 | 0.96 (0.92 to 1.01)                 | 0.97 (0.93 to 1.01)                 |
| Strawberries                | 1.02 (0.95 to 1.09)                 | 1.04 (0.97 to 1.11)                 | 1.07 (0.99 to 1.14)                 | 1.06 (1.00 to 1.12)                 |
| Blueberries                 | 0.75 (0.67 to 0.85)                 | 0.72 (0.64 to 0.81)                 | 0.83 (0.73 to 0.95)                 | 0.85 (0.77 to 0.94)                 |

\* Adjusted for age (years), ethnicity (Caucasian, African American, Hispanic, or Asian), body mass index (<23.0, 23.0-24.9, 25.0-26.9, 27.0-28.9, 29.0-30.9, 31.0-32.9, 33.0-34.9, 35.0-36.9, 37.0-38.9, 39.0-40.9, 41.0-42.9, 43.0-44.9, ≥45.0 kg/m<sup>2</sup>, or missing), smoking status [never, past, current smoker (1-14, 15-24, or ≥25 cigarettes/day), or missing], multivitamin use (yes or no), physical activity (<3.0, 3.0-8.9, 9.0-17.9, 18.0-26.9, ≥27.0 Mets-hour/week, or missing), a family history of diabetes (yes or no), menopausal status and hormone use [pre-menopause, post-menopause (never, past, or current hormone use), or missing, for women], oral contraceptive use (yes, no, or missing, for Nurses' Health Study II) total energy intake (kcal/day), fruit juice consumption (<1, 1, 2-4, or 5-6 servings/week, or ≥1 serving/day) and the modified alternate healthy eating index score (fifths). Individual fruit intakes were mutually adjusted. Results were pooled using a fixed-effects model.

<sup>†</sup> Sensitivity analysis 1 was adjusted for individual dietary factors [alcohol intake (0, 0.1-4.9, 5.0-14.9, or ≥15.0 g/day for women; 0, 0.1-4.9, 5.0-29.9, or ≥30.0 g/day for men), polyunsaturated-to-saturated fat ratio, and intakes of *trans* fat, red meat, fish, whole grains, sugar-sweetened beverage, coffee, and nuts (all in fifths)] instead of the modified alternate healthy eating index score.

<sup>‡</sup> Sensitivity analysis 2 was adjusted for baseline body mass index instead of updated body mass index.

<sup>§</sup> Sensitivity analysis 3 was conducted using baseline intake levels instead of cumulative average of intake levels.

<sup>¶</sup> Sensitivity analysis 4 was conducted using cumulative average of intake levels updated until diagnosis of gestational diabetes, cancer, or cardiovascular disease.
